# Supplementary material for: A high sensitive fluorescence turn-on probe for imaging Zn2+ in aqueous solution and living cells
Source: Royal Society of Chemistry journal article supplement (doi:10.1039/c4ra00584h), 2014-01-01
Supplement: c4ra00584h1.pdf [file c4ra00584h1.pdf]

## A high sensitive fluorescence turn-on probe for imaging $Zn^{2+}$ in aqueous solution and living cells

Ting-Ting Zhang<sup>a,†</sup>, Xin-Peng Chen<sup>b,†</sup>, Jin-Ting Liu<sup>a,\*</sup>, Liang-Zhong Zhang<sup>a</sup>, Jia-Ming Chu<sup>a</sup>, Le Su<sup>b,\*</sup>, Bao-Xiang Zhao<sup>a,\*</sup>

<sup>a</sup> Institute of Organic Chemistry, School of Chemistry and Chemical Engineering, Shandong University, Jinan 250100, P.R. China

<sup>b</sup> School of life, Shandong University, Jinan 250100, P.R. China

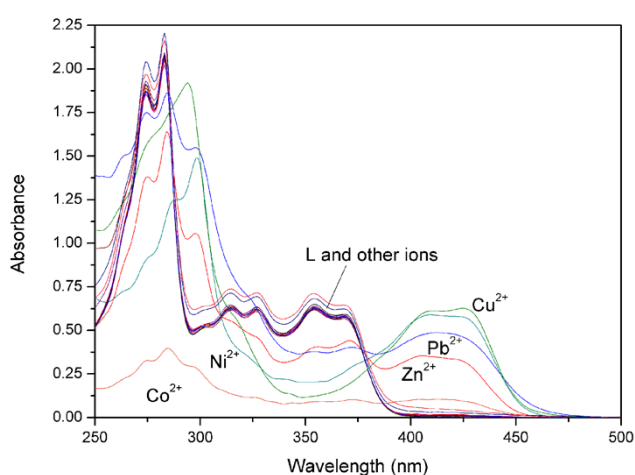

**Fig. S1** UV-vis spectral changes of compound L ( $5 \times 10^{-5}$  M) in the HEPES buffer solution (pH = 7.2, 50%  $CH_3CH_2OH$ , v/v) upon additions of various metal ions ( $25 \times 10^{-5}$  M).

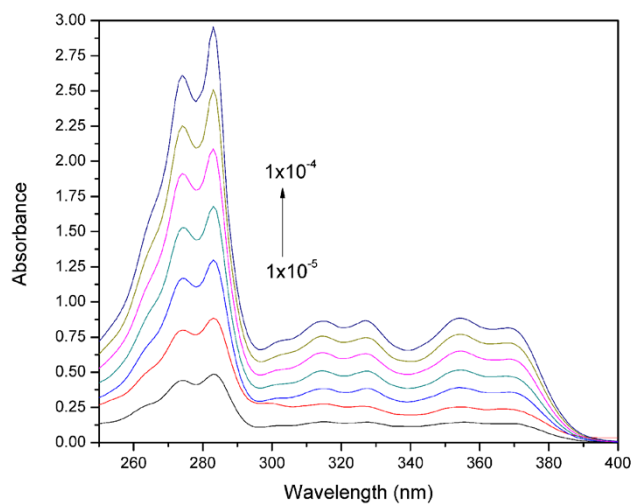

**Fig. S2** UV-vis spectrum of **L** in HEPES buffer solution (20 mM HEPES, pH 7.2, EtOH : H<sub>2</sub>O = 1 : 1) with different concentration

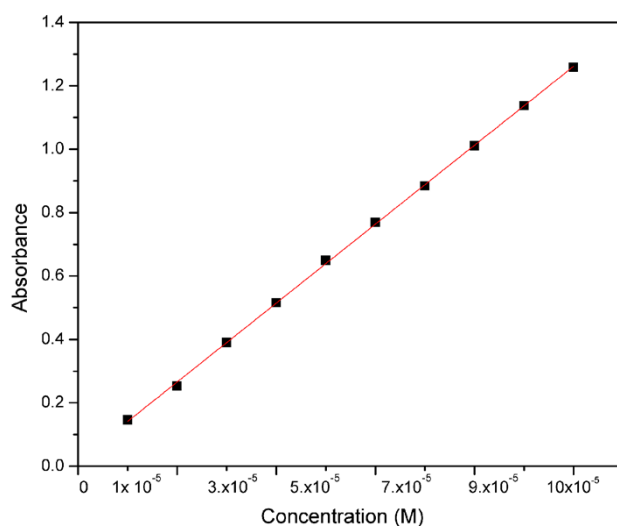

**Fig. S3** Linear relation of the absorbance and **L** concentration at 355 nm.  $R^2 = 0.999$

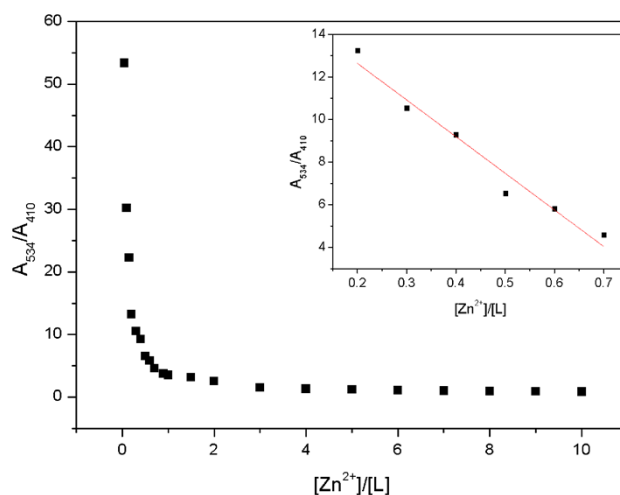

**Fig. S4** The ratio of absorbance (354 nm/410 nm) of **L** (50  $\mu\text{M}$ ) as a function of  $\text{Zn}^{2+}$  concentration. The inset shows the ratio of absorbance at 354 nm and 410 nm ( $A_{354}/A_{410}$ ).  $R^2 = 0.960$ .

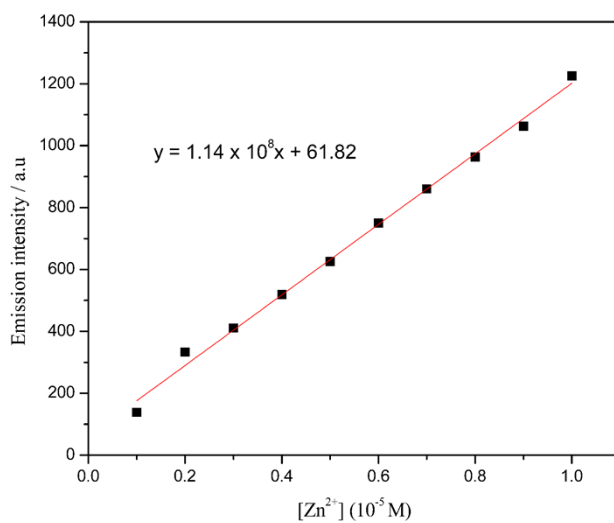

**Fig. S5** Linear regression equation of **L** (10  $\mu\text{M}$ ) upon addition of  $\text{Zn}^{2+}$  (0.1–1.0 equiv.) in EtOH/HEPES (1:1, v/v, pH 7.2).  $R^2 = 0.995$ .

$$\sigma_{\text{bi}} = 4.67; \quad m = 1.14 \times 10^8; \quad \text{LOD} = 3\sigma_{\text{bi}}/m = 1.23 \times 10^{-7} \text{ M}$$

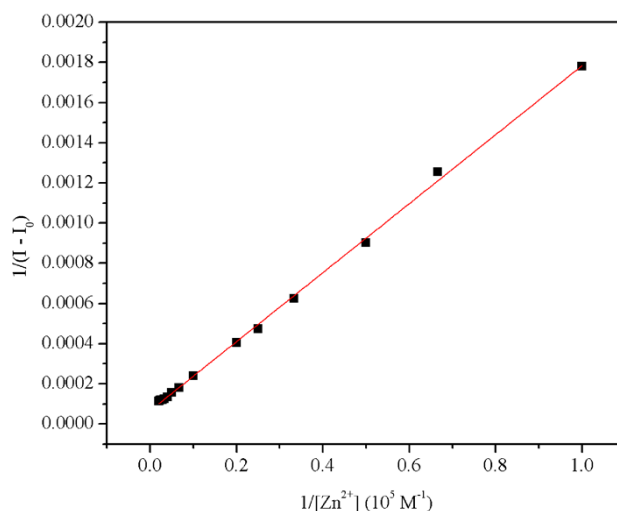

**Fig. S6** Benesi–Hildebrand plot of **L** (10  $\mu$ M) in EtOH/HEPES (1:1, v/v, pH 7.2) buffered solution in the presence of  $Zn^{2+}$  (0.1–50 equiv.).  $R^2 = 0.999$ .

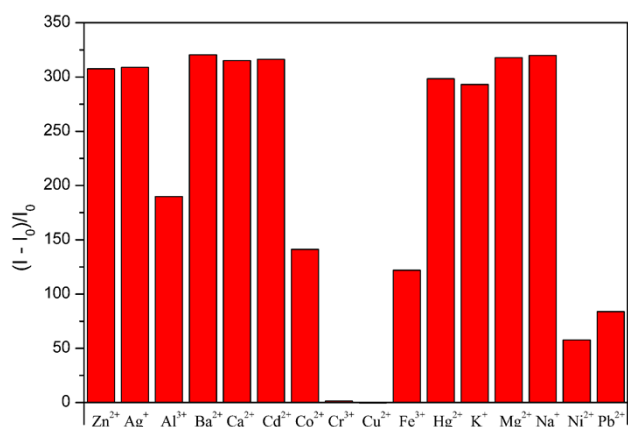

**Fig. S7** Fluorescence emission spectra of **L-Zn<sup>2+</sup>** ( $1.0 \times 10^{-5}$  M) in the presence of  $Al^{3+}$ ,  $Cr^{3+}$ ,  $Fe^{3+}$ ,  $Co^{2+}$ ,  $Cu^{2+}$ ,  $Ni^{2+}$ ,  $Ba^{2+}$ ,  $Pb^{2+}$ ,  $Na^+$ ,  $Mg^{2+}$ ,  $K^+$  and  $Ca^{2+}$  ( $50 \times 10^{-5}$  M) in the HEPES buffer solution (20 mM HEPES, pH = 7.2, EtOH : H<sub>2</sub>O = 1 : 1). (Excitation wavelength: 410 nm).

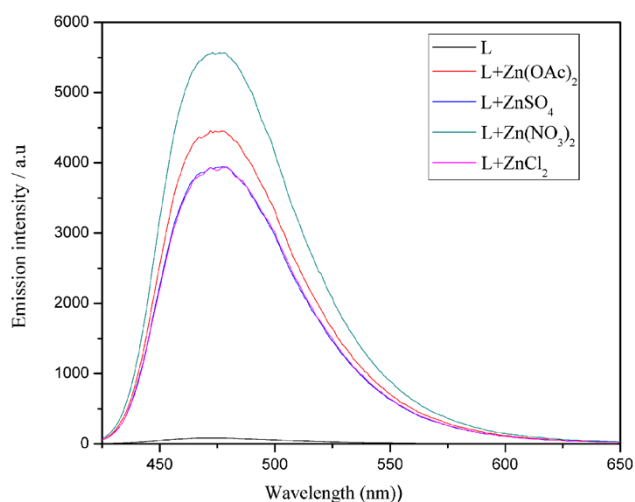

**Fig. S8** Fluorescence emission spectra of free probe **L** (10  $\mu$ M) in buffered EtOH/HEPES (20 mM, pH = 7.2, 1:1, v/v) upon addition of 5 equiv. of different zinc salts.

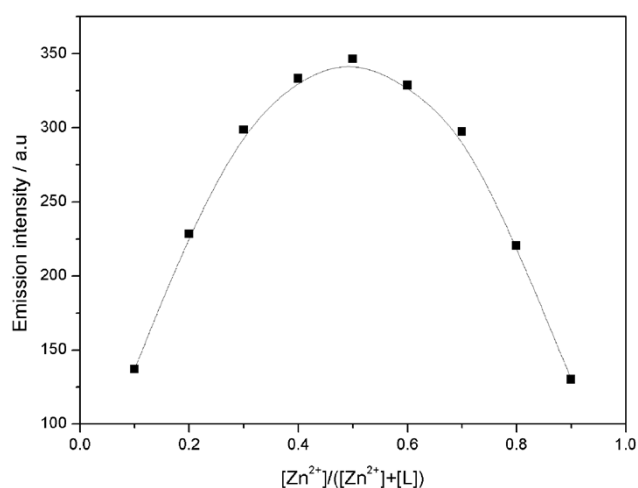

**Fig. S9** Job's plot evaluated from the fluorescence spectra of **L** and  $Zn^{2+}$  at 410 nm in buffered EtOH/HEPES (1/1, v/v, pH 7.2) solution (the total concentration of **L** and  $Zn^{2+}$  is  $1.0 \times 10^{-5}$  M).

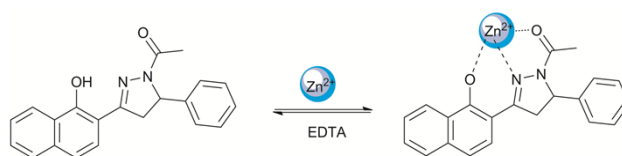

**Fig. S10** Proposed complex structure of **L** with  $Zn^{2+}$ .

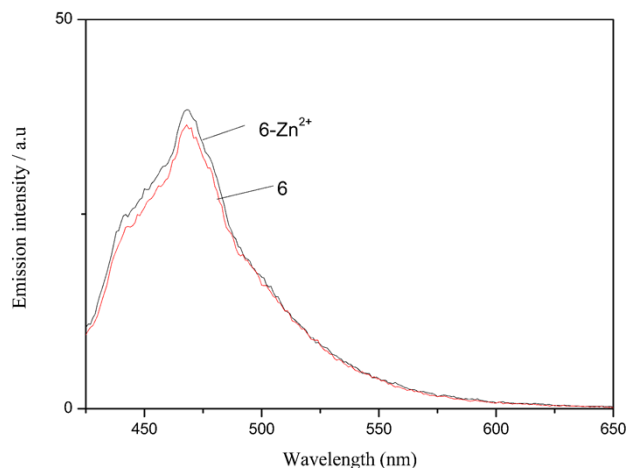

**Fig. S11** Fluorescence spectra of compound **6** ( $1.0 \times 10^{-5}$  M) in the absence and presence of 5 equiv. of  $\text{Zn}^{2+}$  in the HEPES buffer solution (20 mM HEPES, pH = 7.2, EtOH : H<sub>2</sub>O = 1 : 1). (Excitation wavelength: 410 nm).

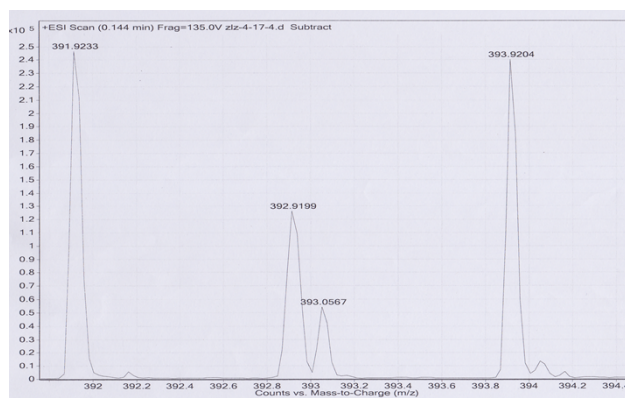

**Fig. S12** HRMS spectra of **L-Zn<sup>2+</sup>** complex.

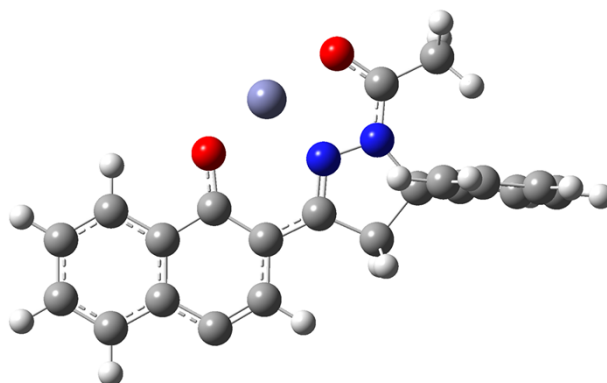

**Fig. S13** Optimized structure of **L-Zn<sup>2+</sup>** by DFT calculation.

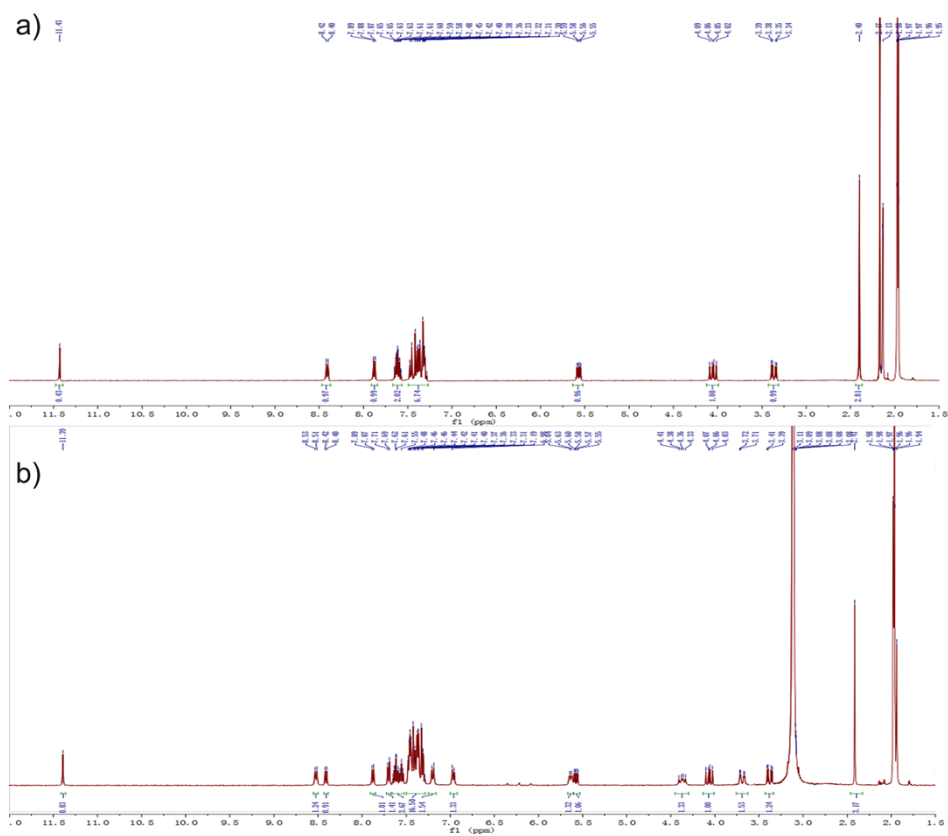

**Fig. S14**  $^1\text{H}$  NMR spectra of **L** with 0, 5.0 equiv.  $\text{Zn}^{2+}$  in  $d\text{-CH}_3\text{CN}$ . (a) Free probe **L**. (b)  $[\text{Zn}^{2+}]/[\text{L}]$  equals 5 : 1.

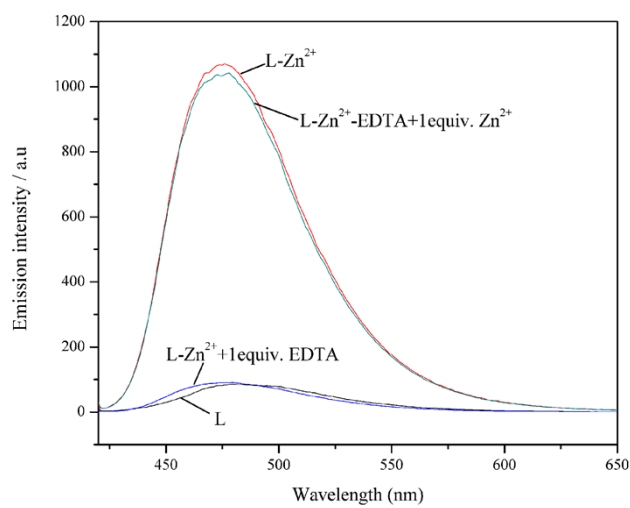

**Fig. S15** Reversibility of **L-Zn** $^{2+}$  binding (Slit: 10 nm/5 nm).

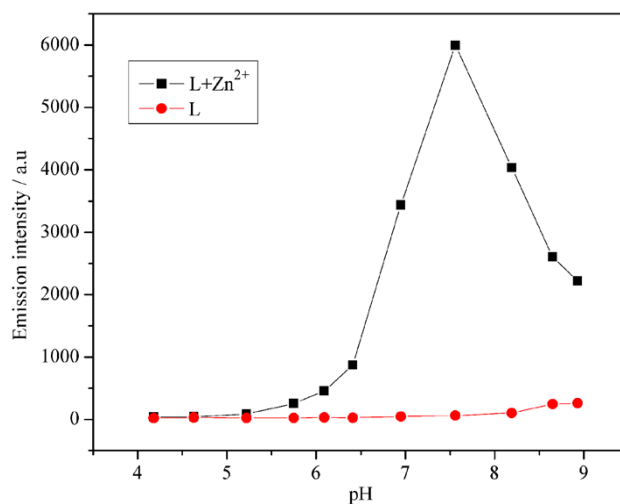

**Fig. S16** Effect of pH on the fluorescence intensity ( $\lambda_{\text{ex}} = 410 \text{ nm}$ ,  $\lambda_{\text{em}} = 472 \text{ nm}$ ) of **L** ( $10 \mu\text{M}$ ) in EtOH/HEPES (1/1, v/v, pH = 7.2) buffered solution measured with and without  $\text{Zn}^{2+}$  (5 equiv.).

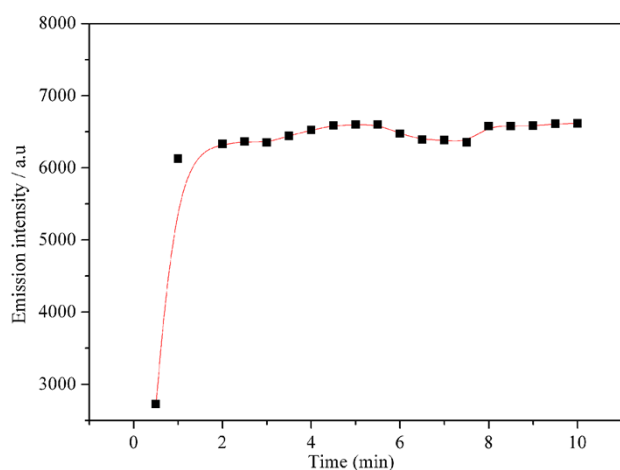

**Fig.S17** Time course of the response of **L** ( $10 \mu\text{M}$ ) in the presence of  $\text{Zn}^{2+}$  (5 equiv.) in EtOH/HEPES (1/1, v/v, pH = 7.2) buffered solution. Excitation wavelength was 410 nm.



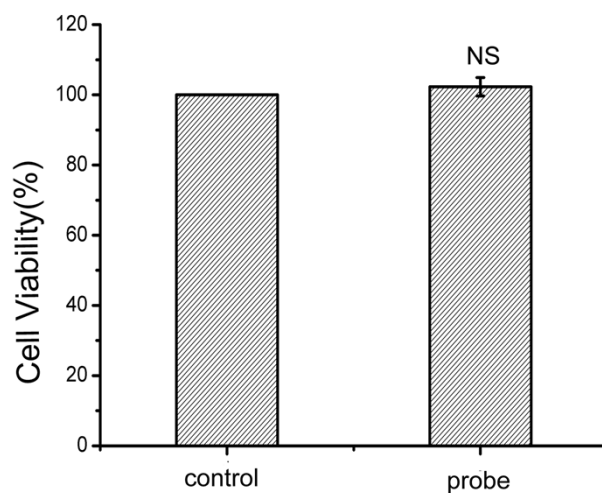

**Fig. S18** SRB assay in HeLa cells with probe concentration of 5  $\mu$ M at 6 h.

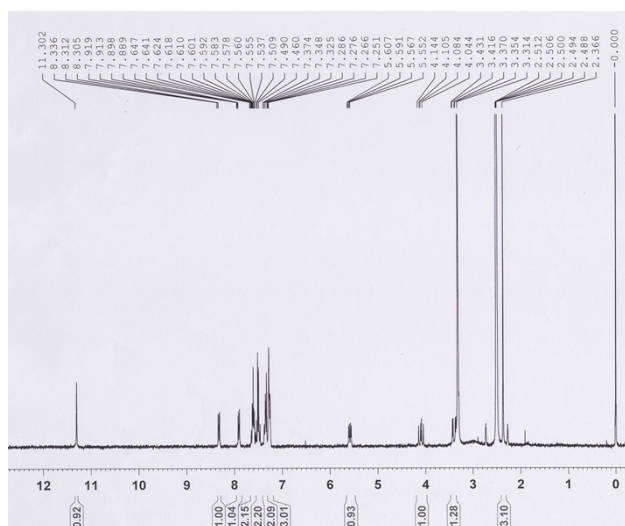

**Fig. S19**  $^1\text{H}$  NMR of 1-(3-hydroxynaphthalen-2-yl)-5-phenyl-4,5-dihydro-1H-pyrazol-1-yl)ethanone (**L**)

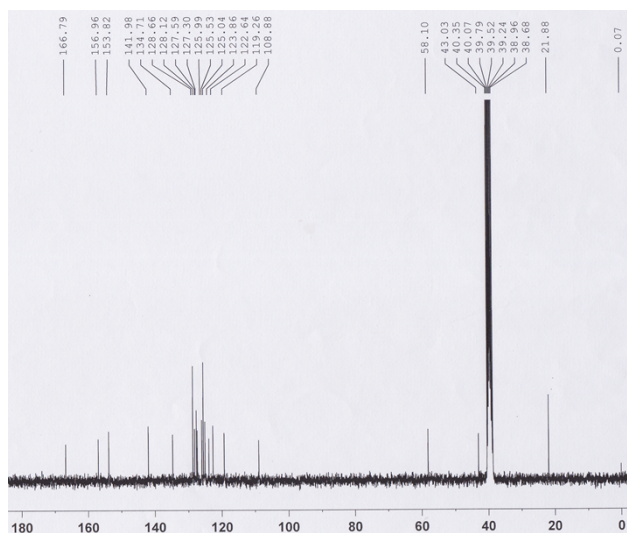

**Fig. S20**  $^{13}\text{C}$  NMR of 1-(3-hydroxynaphthalen-2-yl)-5-phenyl-4,5-dihydro-1H-pyrazol-1-yl)ethanone (**L**)

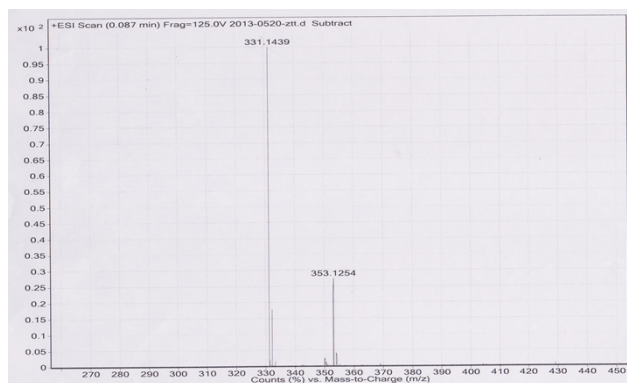

**Fig. S21** HRMS of 1-(3-hydroxynaphthalen-2-yl)-5-phenyl-4,5-dihydro-1H-pyrazol-1-yl)ethanone (**L**)
